# Supplementary material for: Selective rab11 transport and the intrinsic regenerative ability of CNS axons
Source: eLife journal article supplement (doi:10.7554/elife.26956), 2017-08-08
Supplement: supp [file elife_poa_e26956_Table_Table_1.docx]

Table 1: Definition of the measures of regeneration

| Regeneration factor | Regeneration factors were measured as below when a neuron was categorized as regeneration |
| --- | --- |
| Retraction distance | The length of axon that was lost between the location of axotomy and the initial retraction bulb |
| Retraction bulb formation time | The time it took to form the initial retraction bulb, measured from the time point of axotomy |
| Regeneration ratio | The number of neurons that regenerated, over the total neurons which formed a retraction bulb |
| Regeneration initiation time | The time between the retraction bulb formation and the start of a steady extension lasting more than 1hr and leading to regeneration |
| Regeneration length | The length of axon that extended within 2hrs after regeneration initiation time |
| Growth cone area | The average of the extending tip area measured at 20, 40, and 60min after regeneration initiation |
